# Supplementary material for: The Drosophila melanogaster PeptideAtlas facilitates the use of peptide data for improved fly proteomics and genome annotation
Source: PubMed Central journal article supplement (PMC2648944; doi:10.1186/1471-2105-10-59), 2009-02-11
Supplement: 1471-2105-10-59-S2.pdf [file 1471-2105-10-59-S2.pdf]

**“The *Drosophila melanogaster* PeptideAtlas facilitates the use of peptide data for improved fly proteomics and genome annotation.”**

## **Additional File 2**

### **Explanatory screenshots of a PeptideAtlas session using the HTML interface**

This figure shows an exemplary PeptideAtlas user session at [www.drosophila-peptideatlas.org](http://www.drosophila-peptideatlas.org) and is to be read clockwise. The user wants to know a proteotypic peptide for the Heterogeneous Nuclear Ribonucleoprotein Hrb87F (CG12749), more specifically its splice form CG12749-PA. **Upper left:** Result of a Protein Query for CG12749-PA: a condensed representation of the protein and its aligned PAs. **Upper right:** In the Peptide Query, one can narrow down the search by allowing only PAs specific for this gene and, even further, the splice variant CG12749-PA. In addition, the constraint is applied, that a peptide has to be observed at least twice. This way, PeptideAtlas pinpoints to 2 of the 44 peptides one of which (PAp00011594) has been observed 62 times. Both PAs would typically be chosen as PTPs for the design of an SRM assay. **Lower right:** Clicking on a PAp accession provides detailed information about this peptide. The 64 observations divide into 16 in the charge state 2+ and 46 in 3+. **Lower left:** In particular, one can view and download consensus spectra for either of those charge states.

**CG12749-PA**

Protein Name: CG12749-PA  
 Gene Name: CG12749  
 Description: pep:known chromosome:BDGP4.3:3R:9483045:9486241:-1 gene:CG12749  
 transcript:CG12749-RA  
 Total peptides: 411

**Sequence Motifs**

Sequence Position: 0 100 200 300

**Observed Peptides**

Peptide Accessions: PAp00007984, PAp00035563, PAp00033251, PAp00033817, PAp00049679, PAp00011594, PAp00036564, PAp00008862, PAp00024115, PAp00007986, PAp00062940, PAp00050474, PAp00032631, PAp00068255, PAp00062792, PAp00001900, PAp00041608, PAp00031856, PAp00016606, PAp00043174, PAp00020122, PAp00024623, PAp00039599, PAp00043175, PAp00044181, PAp00040513, PAp00024116, PAp00008892, PAp00004808, PAp00028898, PAp00049465, PAp00001817, PAp000043988, PAp00022757, PAp00022812, PAp00032903

**Sequence Coverage**

Unlikely (theoretical)

Sequence Position: 0 100 200 300

Legend:

- Observed peptide with single genome mapping
- Observed peptide with ambiguous genome mapping
- Protein coverage by observed peptides
- Peptides unlikely to be observed

**Sequence**

MAEQNDNSNGN YDDGEEITEP EQLRKLFIGG LDYRTIDDGL KAHFKEKNGNI VDVVVMKDPK TKRSRGGFPI  
 TYSQSYMIDN AQNARPKID GRIVEPKRAV PRQEDSPNA GATVKKLFVG GLRDDHDEEC LREYFKDFGQ  
 IVSVNIVSK DTGKRKGFAP IEFDDYDFVD KILLQKTHSI KNKTLDVKKA IAKQMDRQG GGGGRGGPRA  
 GGRGGQDRG QGGGWWGQN RQNGGGNNGG AGGGGGFNGS GGNFGGGQGG GSGGWNQGG SGGGPWNNQG  
 GNGGWNNGG GGGYGGGNSN GSWGGGGG GGGGGFNGEY QQSYGGGPQR NSNFGNRPAPYSQGGGGGFNK  
 FNKGNQGGQ GFAGNNTYTC GGGQGNMGG GNRRY

**Atlas Build:** DrosophilaMelanogaster\_0.2

**Protein Name Constraint:** CG12749-PA

**Upload File Of Proteins:** Browse...

**Gene Name Constraint:**

**Description Constraint:**

**Peptide Name Constraint:**

**Peptide Sequence Constraint:**

**Best Probability Constraint:**

**Number of Observations Constraint:** >1

**Number of Different Samples Constraint:**

**Empirical Proteotypic Score Constraint:**

**Number of Proteins Mapped Constraint:** =1

**Number of Genome Locations Mapped Constraint:** =1

**Is Exon Spanning?:**

**Samples:** Embryos 0-24h AEL, Embryos up to the blastoderm stage (2hours after egg laying), Fatbodies from 20% sucrose-treated and untreated larvae, Fatbodies from rapamycin-treated and untreated larvae

**Display Options:** Show Chromosomal Mappings, DASFormat, Show SQL Query

QUERY REFRESH Reset

| Peptide Accession | N Obs   | Peptide Sequence      | Chrom | Start Position | End Position | Strand | N Protein Mappings | Best Prob | N Unique Locations on Genome |
|-------------------|---------|-----------------------|-------|----------------|--------------|--------|--------------------|-----------|------------------------------|
| PAp00011594       | Nobs=62 | NSNFGNRPAPYSQGGGGGFNK | 3R    | 9484360        | 9484428      | -      | 1                  | 1.000     | 1                            |
| PAp00022812       | Nobs=3  | FAGNNYTGGGGQGNMGGNR   | 3R    | 9484198        | 9484263      | -      | 1                  | 1.000     | 1                            |

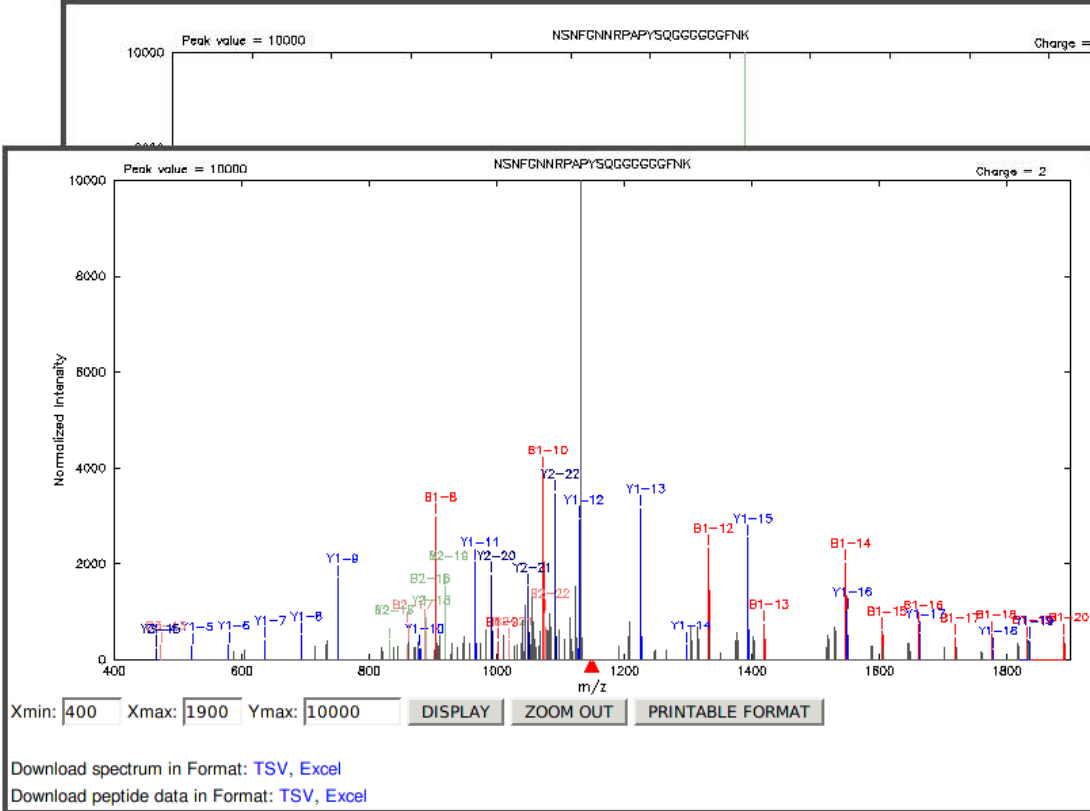

**PAp00011594**

Peptide Accession: PAp00011594  
 Peptide Sequence: NSNFGNRPAPYSQGGGGGFNK  
 Best Probability: 1  
 Times Observed: 62

**Genome Mappings: 1**

| Chr | Protein    | Residues on Exon      | Exon Range        | Strand |
|-----|------------|-----------------------|-------------------|--------|
| 3R  | CG12749-PA | NSNFGNRPAPYSQGGGGGFNK | 9484360 - 9484428 | -      |

**Modified Peptides**

| Modified Sequence     | Charge | Mono Parent m/z | Best Prob | # Obs | # Siblings | Sample IDs            | Consensus Spectrum |
|-----------------------|--------|-----------------|-----------|-------|------------|-----------------------|--------------------|
| NSNFGNRPAPYSQGGGGGFNK | 2      | 1149.0263       | 1         | 16    | 95.8       | 80,88,68,88 [6 more]  |                    |
| NSNFGNRPAPYSQGGGGGFNK | 3      | 766.3535        | 1         | 46    | 96.0       | 91,87,80,88 [10 more] |                    |

**Observed in Samples:**

- 49 S2 cells, nuclear fraction
- 50 Kc cells membrane fraction
- 51 S2 cells, membrane fraction
- 52 Heads from adult flies, membrane fraction
- 61 Kc cells, Chromatin fraction
- 68 Cytoplasmic fractions (soluble proteins) from Adult Drosophila heads
- 76 Dm\_S2\_nuc\_FFE
- 78 Embryos 0-24h AEL
- 86 Gelfiltration of exponentially growing Kc-cell total lysate
- 88 S2cells cytoplasmic fraction
- 90 Dm\_Pupae\_Membranes
- 91 Heads from adult flies, nuclear fraction
